# Supplementary material for: Acyl-Homoserine Lactone Quorum Sensing in the Roseobacter Clade
Source: MDPI journal article supplement (doi:10.3390/ijms15010654), 2014-01-07
Supplement: s1 [file s1]

## Supplementary Information

**Table S1.** Summary of bioinformatic survey of LuxI homologues in sequenced roseobacter genomes.

| Locus Tag <sup>1,2</sup> | LuxI AA Seq Length | Species                                                             |
|--------------------------|--------------------|---------------------------------------------------------------------|
| C357_10192               | 211                | <i>Citricella</i> sp. 357                                           |
| CSE45_4054               | 211                | <i>Citricella</i> sp. SE45                                          |
| <b>Dshi_4152</b>         | 211                | <i>Dinoroseobacter shibae</i> DFL-12, DSM 16493                     |
| Dshi_2851                | 206                | <i>Dinoroseobacter shibae</i> DFL-12, DSM 16493                     |
| Dshi_0312                | 195                | <i>Dinoroseobacter shibae</i> DFL-12, DSM 16493                     |
| Jann_0620                | 195                | <i>Jannaschia</i> sp. CCS1                                          |
| Leiaq_00074              | 213                | <i>Leisingera aquimarina</i> DSM 24565 (scaffold version)           |
| Leiaq_04264              | 190                | <i>Leisingera aquimarina</i> DSM 24565 (scaffold version)           |
| Leime_1139               | 213                | <i>Leisingera methylohalidivorans</i> MB2, DSM 14336                |
| Leime_2648               | 221                | <i>Leisingera methylohalidivorans</i> MB2, DSM 14336                |
| Leina_00212              | 266                | <i>Leisingera nanhaiensis</i> NH52F, DSM 24252 (scaffold version)   |
| Leina_03458              | 212                | <i>Leisingera nanhaiensis</i> NH52F, DSM 24252 (scaffold version)   |
| LSE62_0617               | 211                | <i>Loktanella</i> sp. SE62                                          |
| LSE62_3231               | 224                | <i>Loktanella</i> sp. SE62                                          |
| H147DRAFT_00614          | 224                | <i>Loktanella vestfoldensis</i> DSM 16212                           |
| SKA53_05830              | 212                | <i>Loktanella vestfoldensis</i> SKA53                               |
| RB2654_09014             | 213                | <i>Maritimibacter alkaliphilus</i> HTCC2654                         |
| RB2654_20048             | 195                | <i>Maritimibacter alkaliphilus</i> HTCC2654                         |
| B139DRAFT_0037           | 195                | <i>Maritimibacter</i> sp. HL-12                                     |
| <b>B139DRAFT_2385</b>    | 215                | <i>Maritimibacter</i> sp. HL-12                                     |
| RR11_2017                | 200                | <i>Nautella italica</i> R11                                         |
| RR11_2520                | 213                | <i>Nautella italica</i> R11                                         |
| <b>OIHEL45_00955</b>     | 279                | <i>Oceanibulbus indolifex</i> HEL-45                                |
| OG2516_02294             | 214                | <i>Oceanicola granulosus</i> HTCC2516                               |
| OCGS_2461                | 196                | <i>Oceaniovalibus guishaninsula</i> JLT2003                         |
| OAN307_c21810            | 208                | <i>Octadecabacter antarcticus</i> 307                               |
| OAN307_c41320            | 212                | <i>Octadecabacter antarcticus</i> 307                               |
| OA238_2886               | 134                | <i>Octadecabacter arcticus</i> 238, DSM 13978                       |
| Phaar_01741              | 193                | <i>Phaeobacter arcticus</i> DSM 23566                               |
| Phaar_02924              | 213                | <i>Phaeobacter arcticus</i> DSM 23566                               |
| <b>Phaar_00769</b>       | 200                | <i>Phaeobacter arcticus</i> DSM 23566                               |
| PhacaeDRAFT_0324         | 190                | <i>Phaeobacter caeruleus</i> 13, DSM 24564                          |
| PhacaeDRAFT_1367         | 213                | <i>Phaeobacter caeruleus</i> 13, DSM 24564                          |
| PhacaeDRAFT_2710         | 221                | <i>Phaeobacter caeruleus</i> 13, DSM 24564                          |
| PhacaeDRAFT_3752         | 208                | <i>Phaeobacter caeruleus</i> 13, DSM 24564                          |
| PhacaeDRAFT_4672         | 212                | <i>Phaeobacter caeruleus</i> 13, DSM 24564                          |
| Phada_01951              | 213                | <i>Phaeobacter daeponensis</i> TF-218, DSM 23529 (scaffold version) |
| Phada_03339              | 221                | <i>Phaeobacter daeponensis</i> TF-218, DSM 23529 (scaffold version) |
| <b>PGA1_c07680</b>       | 202                | <i>Phaeobacter gallaeciensis</i> DSM 17395                          |
| PGA2_c03440              | 213                | <i>Phaeobacter gallaeciensis</i> 2.10                               |
| <b>PGA2_c07460</b>       | 249                | <i>Phaeobacter gallaeciensis</i> 2.10                               |

Table S1. Cont.

| Locus Tag <sup>1,2</sup>  | LuxI AA Seq Length | Species                                    |
|---------------------------|--------------------|--------------------------------------------|
| PGA2_c18960               | 235                | <i>Phaeobacter gallaeciensis</i> 2.10      |
| RGBS107_08956             | 213                | <i>Phaeobacter gallaeciensis</i> DSM 17395 |
| PhainDRAFT_0507           | 235                | <i>Phaeobacter inhibens</i> T5, DSM 16374  |
| PhainDRAFT_1820           | 190                | <i>Phaeobacter inhibens</i> T5, DSM 16374  |
| PhainDRAFT_2120           | 213                | <i>Phaeobacter inhibens</i> T5, DSM 16374  |
| <b>PhainDRAFT_1688</b>    | 202                | <i>Phaeobacter inhibens</i> T5, DSM 16374  |
| RB41_3464                 | 221                | <i>Phaeobacter</i> sp. Y41.                |
| RB41_3631                 | 213                | <i>Phaeobacter</i> sp. Y41.                |
| ANG1_1315                 | 213                | <i>Phaeobacter gallaeciensis</i> ANG1      |
| D516_1373                 | 210                | <i>Rhodobacter</i> sp. AKP1                |
| RB2083_730                | 207                | Rhodobacterales sp. HTCC2083               |
| RB2083_3255               | 259                | Rhodobacterales sp. HTCC2083               |
| RB2150_11291              | 213                | Rhodobacterales sp. HTCC2150               |
| RB2150_14421              | 205                | Rhodobacterales sp. HTCC2150               |
| RD1_1639                  | 212                | <i>Roseobacter denitrificans</i> OCh 114   |
| RLO149_c030680            | 212                | <i>Roseobacter litoralis</i> Och 149       |
| RLO149_c036210            | 210                | <i>Roseobacter litoralis</i> Och 149       |
| <b>RLO149_c036590</b>     | 214                | <i>Roseobacter litoralis</i> Och 149       |
| RAZWK3B_04275             | 212                | <i>Roseobacter</i> sp. AzwK-3b             |
| <b>RAZWK3B_19371</b>      | 248                | <i>Roseobacter</i> sp. AzwK-3b             |
| MED193_10423              | 213                | <i>Roseobacter</i> sp. MED193              |
| <b>MED193_08053</b>       | 200                | <i>Roseobacter</i> sp. MED193              |
| R2A57_2404                | 212                | <i>Roseobacter</i> sp. R2A57               |
| <b>RSK20926_22084</b>     | 221                | <i>Roseobacter</i> sp. SK209-2-6           |
| RSK20926_15131            | 246                | <i>Roseobacter</i> sp. SK209-2-6           |
| RCCS2_02078               | 224                | <i>Roseobacter</i> sp. CCS2                |
| ROS217_18267              | 264                | <i>Roseovarius</i> sp. 217                 |
| ROS217_01410              | 221                | <i>Roseovarius</i> sp. 217                 |
| RTM1035_10485             | 264                | <i>Roseovarius</i> sp. TM1035              |
| <b>ISM_03755</b>          | 201                | <i>Roseovarius nubinhibens</i> ISM         |
| SPO0372                   | 212                | <i>Ruegeria pomeroyi</i> DSS-3             |
| SPO2287                   | 286                | <i>Ruegeria pomeroyi</i> DSS-3             |
| RKLH11_260                | 212                | <i>Ruegeria</i> sp. KLH11                  |
| RKLH11_2275               | 284                | <i>Ruegeria</i> sp. KLH11                  |
| <b>RKLh11</b>             | 214                | <i>Ruegeria</i> sp. KLH11                  |
| <b>SCH4B_1938</b>         | 210                | <i>Silicibacter</i> sp. TrichCH4B          |
| <b>RTW15_010100005486</b> | 200                | <i>Ruegeria</i> sp. TW15                   |
| RTW15_010100013872        | 284                | <i>Ruegeria</i> sp. TW15                   |
| RTW15_010100017784        | 212                | <i>Ruegeria</i> sp. TW15                   |
| SSE37_11164               | 212                | <i>Sagittula stellata</i> E-37             |
| SL1157_0612               | 212                | <i>Ruegeria lacuscaerulensis</i> ITI-1157  |
| SL1157_1706               | 221                | <i>Ruegeria lacuscaerulensis</i> ITI-1157  |
| SL1157_2476               | 284                | <i>Ruegeria lacuscaerulensis</i> ITI-1157  |

Table S1. Cont.

| Locus Tag <sup>1,2</sup>                             | LuxI AA Seq Length | Species                                                |
|------------------------------------------------------|--------------------|--------------------------------------------------------|
| <b>EE36_01635</b>                                    | 242                | <i>Sulfitobacter</i> sp. EE-36                         |
| <b>RGAI101_1101</b>                                  | 248                | <i>Sulfitobacter</i> sp. GAI101                        |
| RGAI101_3395                                         | 211                | <i>Sulfitobacter</i> sp. GAI101                        |
| <b>NAS141_00695</b>                                  | 242                | <i>Sulfitobacter</i> sp. NAS-14.1                      |
| NAS141_01136 (is not used for tree thus 96sequenced) | 121                | <i>Sulfitobacter</i> sp. NAS-14.1                      |
| TR2A62_3166                                          | 220                | <i>Thalassibium</i> sp. R2A62                          |
|                                                      |                    | <i>Loktanella hongkongensis</i> DSM 17492 <sup>3</sup> |
|                                                      |                    | <i>Oceanicola batsensis</i> HTCC2597 <sup>3</sup>      |
|                                                      |                    | <i>Pelagibaca bermudensis</i> HTCC2601 <sup>3</sup>    |
|                                                      |                    | <i>Rhodobacterales</i> sp. HTCC2255 <sup>3</sup>       |
|                                                      |                    | <i>Ruegeria</i> sp. TM1040 <sup>3</sup>                |
|                                                      |                    | <i>Pseudovibrio</i> sp. JE062 <sup>3</sup>             |
|                                                      |                    | <i>Pseudovibrio</i> sp. FO-BEG1 <sup>3</sup>           |

<sup>1</sup> All the homologues belong to the family of Pfam00765; <sup>2</sup> Bold indicates LuxI solo; <sup>3</sup> The sequenced genomes that do not have LuxI homologue.

© 2014 by the authors; licensee MDPI, Basel, Switzerland. This article is an open access article distributed under the terms and conditions of the Creative Commons Attribution license (<http://creativecommons.org/licenses/by/3.0/>).
